# Supplementary material for: Abnormal islet sphingolipid metabolism in type 1 diabetes
Source: PubMed Central journal article supplement (PMC6445476; doi:10.1007/s00125-018-4614-2), 2018-04-18
Supplement: 125_2018_4614_MOESM1_ESM.pdf [file 125_2018_4614_MOESM1_ESM.pdf]

## Electronic Supplementary Material

**ESM Table 1** List of human samples **(a)** Tissue samples. **(b)** Samples used for transcriptome analysis. **(c)** Samples used for T cell proliferation.

| <b>a) Tissue samples</b>         |                |         |             |                  |                |
|----------------------------------|----------------|---------|-------------|------------------|----------------|
| Patient                          | Age<br>(years) | Sex     | Disease     | Disease duration | Source         |
| DiViD 6                          | 35             | Male    | T1D         | 5w               | DiViD          |
| DiViD 5                          | 24             | Female  | T1D         | 5w               | DiViD          |
| DiViD 4                          | 31             | Male    | T1D         | 5w               | DiViD          |
| DiViD 3                          | 34             | Female  | T1D         | 9w               | DiViD          |
| DiViD 2                          | 24             | Male    | T1D         | 3w               | DiViD          |
| DiViD 1                          | 25             | Female  | T1D         | 4w               | DiViD          |
| 28 74                            | 52             | Female  | No diabetes | N/A              | Exeter         |
| 540 91                           | 11             | Male    | No diabetes | N/A              | Exeter         |
| 8579                             | 7              | UNK     | No diabetes | N/A              | Exeter         |
| E560                             | 17             | Male    | T1D         | 1w               | Exeter         |
| E124B                            | 42             | Female  | T1D         | 18m              | Exeter         |
| 11746                            | 6              | Male    | T1D         | <1w              | Exeter         |
| 1                                | Unknown        | Unknown | No diabetes | N/A              | Rigshospitalet |
| 2                                | Unknown        | Unknown | No diabetes | N/A              | Rigshospitalet |
| 3                                | Unknown        | Unknown | No diabetes | N/A              | Rigshospitalet |
| <b>b) Transcriptome analysis</b> |                |         |             |                  |                |
| Patient                          | Age<br>(years) | Sex     | Disease     | Disease duration | Source         |
| 6013-04PT                        | 65             | Male    | No diabetes | N/A              | nPOD           |
| 6024-01PT                        | 21             | Male    | No diabetes | N/A              | nPOD           |

|             |      |        |             |         |       |
|-------------|------|--------|-------------|---------|-------|
| 6048-04PT   | 30   | Male   | No diabetes | N/A     | nPOD  |
| 6075-06PB   | 16   | Male   | No diabetes | N/A     | nPOD  |
| 6012-02PT   | 68   | Female | No diabetes | N/A     | nPOD  |
| 6099-02PB   | 14   | Male   | No diabetes | N/A     | nPOD  |
| 6140-04PT   | 38   | Male   | No diabetes | N/A     | nPOD  |
| 6162-01PT   | 22   | Male   | No diabetes | N/A     | nPOD  |
| 6168-04PT   | 51   | Male   | No diabetes | N/A     | nPOD  |
| 6227-02PT   | 17   | Female | No diabetes | N/A     | nPOD  |
| 6129-02PT   | 42.9 | Female | No diabetes | N/A     | nPOD  |
| 6165-04PT   | 45.8 | Female | No diabetes | N/A     | nPOD  |
| 6102-04PT   | 45.1 | Female | No diabetes | N/A     | nPOD  |
| 6229-02PT   | 31   | Female | No diabetes | N/A     | nPOD  |
| 6251-02PT   | 33   | Female | No diabetes | N/A     | nPOD  |
| 6010-04PT   | 47   | Female | No diabetes | N/A     | nPOD  |
| 6179-04B PB | 21.8 | Female | No diabetes | N/A     | nPOD  |
| 6019-04PT   | 42   | Male   | No diabetes | N/A     | nPOD  |
| 6188-06PT   | 36.1 | Male   | T2D         | Unknown | nPOD  |
| 6114-03PT   | 42.8 | Male   | T2D         | Unknown | nPOD  |
| 6249-01PT   | 45   | Female | T2D         | Unknown | nPOD  |
| 6275-02PT   | 48   | Male   | T2D         | Unknown | nPOD  |
| 6273-04PT   | 45   | Female | T2D         | Unknown | nPOD  |
| 6191-01PT   | 62   | Female | T2D         | Unknown | nPOD  |
| 6059-06PT   | 18.8 | Female | T2D         | Unknown | nPOD  |
| 6110-05PT   | 20.7 | Female | T2D         | Unknown | nPOD  |
| DiViD 6     | 35   | Male   | T1D         | 5w      | DiViD |
| DiViD 5     | 24   | Female | T1D         | 5w      | DiViD |
| DiViD 4     | 31   | Male   | T1D         | 5w      | DiViD |

| DiViD 3                        | 34             | Female | T1D     | 9w                          | DiViD        |
|--------------------------------|----------------|--------|---------|-----------------------------|--------------|
| DiViD 2                        | 24             | Male   | T1D     | 3w                          | DiViD        |
| <b>d) T cell proliferation</b> |                |        |         |                             |              |
| Patient                        | Age<br>(years) | Sex    | Disease | Disease duration<br>(years) | GRS group    |
| 55                             | 19.6           | Female | T1D     | 8.2                         | HIGH         |
| 57                             | 1.3            | Male   | T1D     | 0.3                         | INTERMEDIATE |
| 65                             | 18.7           | Male   | T1D     | 16.8                        | INTERMEDIATE |
| 66                             | 13.9           | Male   | T1D     | 8.0                         | INTERMEDIATE |
| 68                             | 19.0           | Male   | T1D     | 4.5                         | INTERMEDIATE |
| 76                             | 20.1           | Male   | T1D     | 16.7                        | LOW          |
| 77                             | 20.1           | Male   | T1D     | 8.1                         | LOW          |
| 79                             | 16.2           | Female | T1D     | 3.8                         | INTERMEDIATE |
| 80                             | 16.1           | Female | T1D     | 11.0                        | HIGH         |
| 81                             | 13.1           | Female | T1D     | 6.7                         | INTERMEDIATE |
| 83                             | 18.0           | Male   | T1D     | 8.3                         | INTERMEDIATE |
| 84                             | 16.9           | Female | T1D     | 8.2                         | INTERMEDIATE |
| 85                             | 39.8           | Male   | T1D     | 32.0                        | INTERMEDIATE |
| 86                             | 12.3           | Female | T1D     | 0.8                         | INTERMEDIATE |
| 87                             | 11.1           | Male   | T1D     | 2.0                         | LOW          |
| 88                             | 23.1           | Female | T1D     | 21.8                        | LOW          |
| 89                             | 23.8           | Male   | T1D     | 12.0                        | INTERMEDIATE |
| 90                             | 24.3           | Female | T1D     | 13.9                        | LOW          |
| 91                             | 23.8           | Female | T1D     | 21.6                        | INTERMEDIATE |
| 92                             | 13.7           | Male   | T1D     | 3.9                         | INTERMEDIATE |
| 93                             | 18.4           | Male   | T1D     | 6.6                         | HIGH         |
| 94                             | 13.8           | Male   | T1D     | 0.0                         | HIGH         |

|     |      |        |     |         |              |
|-----|------|--------|-----|---------|--------------|
| 95  | 21.6 | Male   | T1D | 6.3     | INTERMEDIATE |
| 96  | 17.9 | Female | T1D | 16.2    | HIGH         |
| 97  | 11.2 | Female | T1D | 0.0     | INTERMEDIATE |
| 98  | 13.4 | Male   | T1D | 0.0     | LOW          |
| 100 | 14.0 | Male   | T1D | 12.1    | HIGH         |
| 101 | 11.7 | Female | T1D | 0.1     | INTERMEDIATE |
| 103 | 13.6 | Male   | T1D | 0.1     | INTERMEDIATE |
| 104 | 19.5 | Male   | T1D | 4.6     | INTERMEDIATE |
| 105 | 13.3 | Female | T1D | 0.0     | HIGH         |
| 106 | 18.7 | Male   | T1D | 13.0    | INTERMEDIATE |
| 107 | 19.9 | Male   | T1D | 14.3    | LOW          |
| 108 | 10.4 | Female | T1D | 0.0     | HIGH         |
| 109 | 5.9  | Male   | T1D | 0.0     | HIGH         |
| 110 | 16.4 | Female | T1D | 11.2    | INTERMEDIATE |
| 111 | 19.5 | Female | T1D | 11.6    | INTERMEDIATE |
| 112 | 18.8 | Male   | T1D | 16.2    | LOW          |
| 113 | 16.7 | Male   | T1D | 6.0     | INTERMEDIATE |
| 114 | 17.2 | Male   | T1D | 0.2     | HIGH         |
| 115 | 22.6 | Female | T1D | 12.3    | HIGH         |
| 125 | 15.4 | Male   | T1D | 0.0     | INTERMEDIATE |
| 127 | 11.4 | Female | T1D | 8.4     | INTERMEDIATE |
| 129 | 17.1 | Female | T1D | 10.1    | LOW          |
| 134 | 20.7 | Male   | T1D | 10.2    | HIGH         |
| 135 | 13.6 | Male   | T1D | 1.5     | INTERMEDIATE |
| 136 | 20.8 | Female | T1D | 11.5    | LOW          |
| 137 | 21.4 | Male   | T1D | 19.2    | LOW          |
| 138 | 21.3 | Male   | T1D | Unknown | INTERMEDIATE |

|     |      |        |     |         |              |
|-----|------|--------|-----|---------|--------------|
| 139 | 19.3 | Female | T1D | 6.1     | INTERMEDIATE |
| 140 | 18.8 | Male   | T1D | Unknown | LOW          |
| 141 | 14.2 | Male   | T1D | 8.3     | LOW          |
| 142 | 14.5 | Male   | T1D | 6.8     | LOW          |
| 143 | 29.1 | Female | T1D | 5.7     | LOW          |
| 144 | 34.3 | Female | T1D | 25.4    | LOW          |
| 145 | 34.9 | Female | T1D | 0.0     | LOW          |
| 147 | 18.0 | Male   | T1D | 3.0     | INTERMEDIATE |
| 148 | 8.8  | Female | T1D | 0.0     | INTERMEDIATE |
| 149 | 23.9 | Male   | T1D | 12.5    | INTERMEDIATE |
| 150 | 18.1 | Male   | T1D | 5.9     | LOW          |
| 152 | 14.6 | Male   | T1D | 1.1     | INTERMEDIATE |
| 153 | 18.3 | Female | T1D | Unknown | INTERMEDIATE |
| 154 | 23.5 | Male   | T1D | 20.8    | INTERMEDIATE |
| 155 | 21.3 | Female | T1D | 12.9    | INTERMEDIATE |
| 156 | 29.6 | Female | T1D | Unknown | LOW          |
| 157 | 14.9 | Male   | T1D | 7.9     | INTERMEDIATE |
| 159 | 6.6  | Male   | T1D | 0.1     | LOW          |
| 160 | 20.6 | Female | T1D | 16.8    | HIGH         |
| 161 | 10.3 | Female | T1D | 0.1     | INTERMEDIATE |
| 162 | 18.9 | Male   | T1D | 8.4     | INTERMEDIATE |
| 163 | 13.7 | Female | T1D | 0.0     | HIGH         |

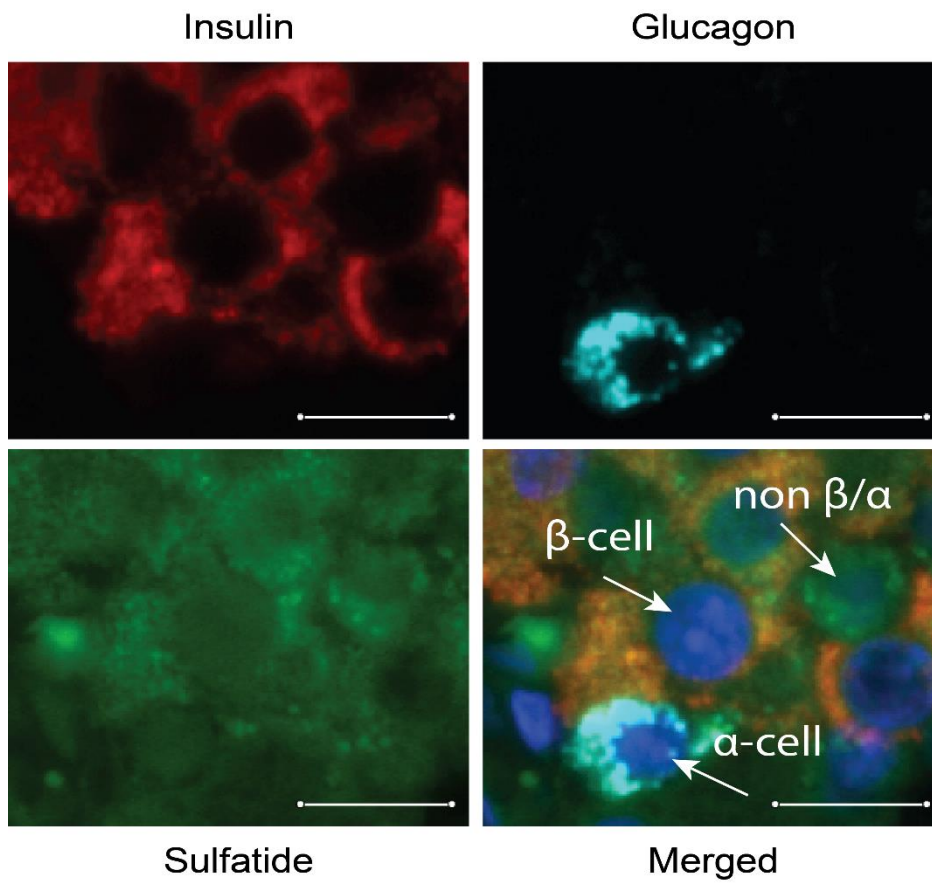

**ESM Fig. 1** Sulfatide is present in beta cells and not alpha cells. Immunofluorescent staining of a healthy pancreas sections showing that sulfatide is expressed in beta cells and occasionally in cells negative for both insulin and glucagon. Scale bar, 10  $\mu\text{m}$ .

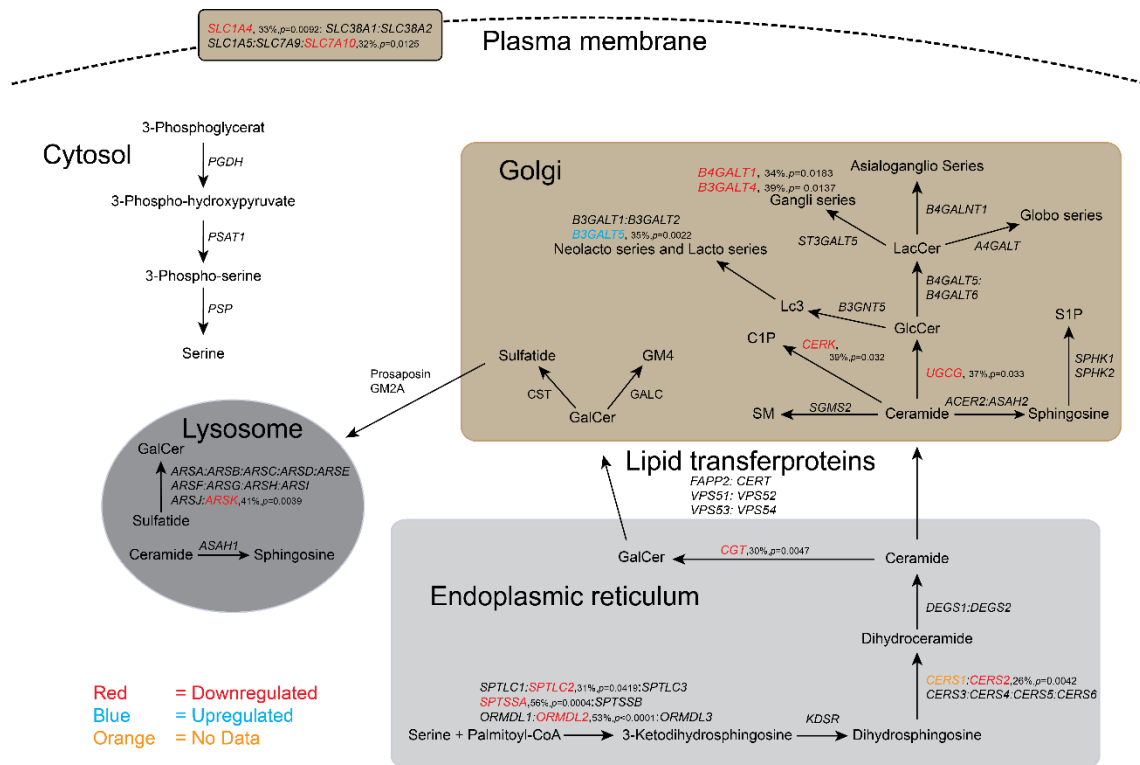

**ESM Fig. 2** Overview of the altered RNA expression in pancreatic islets of individuals with newly diagnosed type 1 diabetes vs control participants. The enzymes are listed next to the catalytic reaction they are involved in. It should be noted that some enzymes catalyze more reactions than shown here. The number after the enzymes name represents the change in percent followed by the  $p$  value. The difference in expression is showed for genes with a  $p$  value  $<0.05$ . No difference between control participants and individuals with type 2 diabetes for the selected genes. One-way ANOVA with Tukey's multiple comparisons test.

3-ketodihydrospingosine reductase (*KDSR*);  $\Delta$ 4-dihydroceramide desaturase (*DEGS*); Galactosylceramide (GalCer); N-acylsphingosine amidohydrolase (*ASAH*); sphingomyelin (SM); C1P, ceramide-1-phosphate; S1P, sphingosine-1-phosphate; alkaline ceramidase (*ACER*); sphingomyelin synthase (*SGMS*); sphingosine kinase (*SPHK*); cerebroside sulfotransferase (*CST*); galactosylceramidase (*GALC*); glucosylceramide (GlcCer); lactosylceramide (LacCer); pleckstrin homology domain containing A8 (*FAPP2* or *PLEKHA8*); ceramide transfer protein (*CERT*); VPS, GARP, complex subunit (*VPS*). solute

carrier family (*SLC*); GM2 ganglioside activator (*GM2A*); beta-1,3-galactosyltransferase (*B3GALT*); beta-1,4-galactosyltransferase (*B4GALT*); lactotriaosylceramide (*Lc3*); UDP-GlcNAc:betaGal beta-1,3-N-acetylglucosaminyltransferase (*B3GNT*); alpha 1,4-galactosyltransferase (*A4GALT*); beta-1,4-N-acetyl-galactosaminyltransferase (*B4GALNT*); galactose- $\alpha$ 2,3-sialyltransferase (*ST3GALT*); phosphoglycerate dehydrogenase (*PGDH*); phosphoserine aminotransferase (*PSAT*); phosphoserine phosphatase (*PSP*)



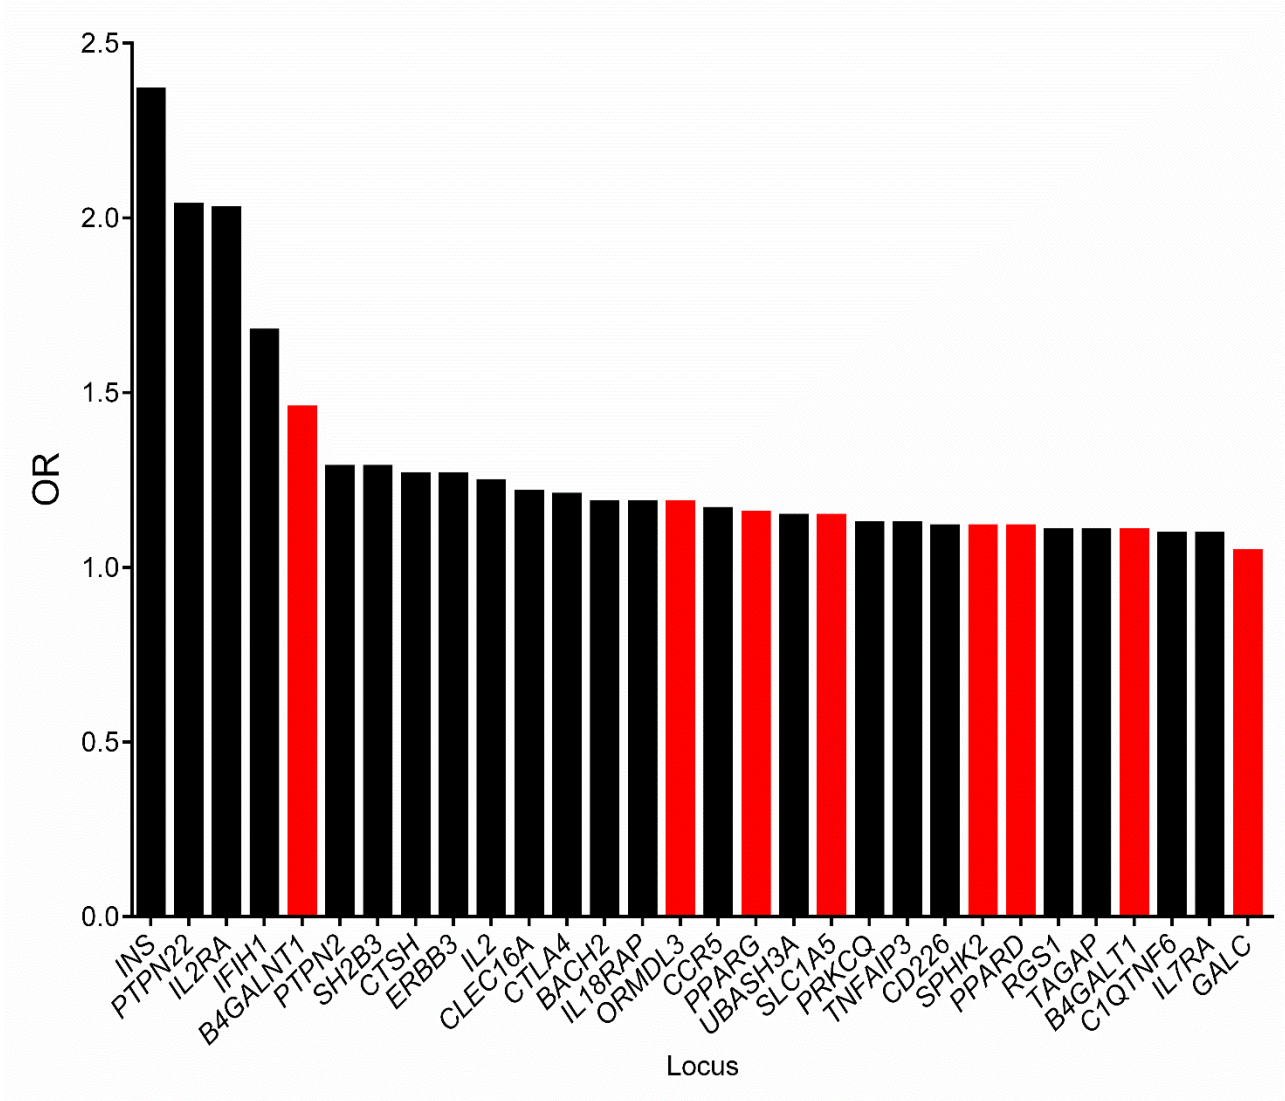

**ESM Fig. 3** Ranked non-HLA loci associated with type 1 diabetes. Red bars represent genes identified in this study. List of genes taken from [1].

[1] Concannon P, Rich SS, Nepom GT (2009) Genetics of type 1A diabetes. *N Engl J Med* 360: 1646-1654
